# Supplementary material for: TERT promoter mutations and polymorphisms as prognostic factors in primary glioblastoma
Source: PubMed Central journal article supplement (PMC4599297; doi:10.18632/oncotarget.4389), 2015-06-22
Supplement: oncotarget-06-16663-s001.pdf [file oncotarget-06-16663-s001.pdf]

## SUPPLEMENTARY FIGURE AND TABLE

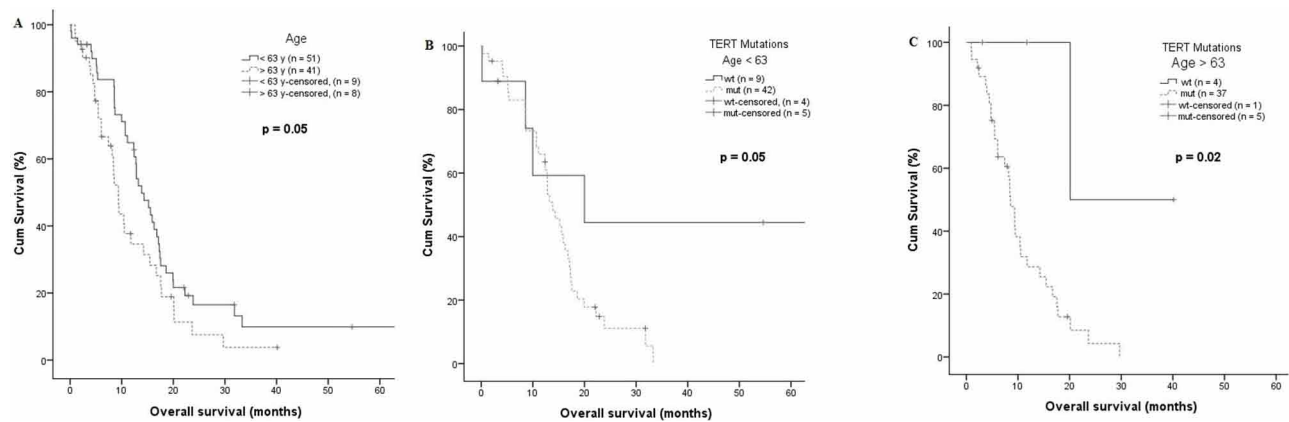

**Supplementary Figure S1: The prognostic impact of median age at diagnosis (<63y/ ≥63y) was analyzed for the entire GBM patient cohort A.** A significantly reduced OS was shown for older patients (>63 years)  $p = 0.05$ . The impact of the *TERT* promoter mutation status on patient OS was analyzed in age stratified patient subgroup **B**. & **C**. A significantly reduced OS was observed in the subgroup older than 63 years ( $p = 0.02$ ).

Supplementary Table S1: *TERT*, *POT1* and *IDH1/2* primers

|                 | Forward primer            | Reverse primer            |
|-----------------|---------------------------|---------------------------|
| TRET promoter   | GGCCGATTCGACCTCTCT        | AGCACCTCGCGGTAGTGG        |
| TERT rs10069690 | biotin-TCCTGGCCGCATGTGTGT | AGAGTGTGGGGTGAGGTGGA      |
| POT1-EX5        | AGCATGTAATCACATTGGAGGT    | TCTATGTGTGTGGCATATACAGG   |
| POT1-EX6        | CATGGATTTGCTGCTAATATGAT   | TGGAACCGTGTTCCTAAATC      |
| POT1-EX7        | TGAAAGCCAAGAAAATGTCTC     | TGAAAAGCTTGCTGTCATGT      |
| POT1-EX8        | TTCCAGTTTCTTTGGTTCGT      | CACAGCATGCTTTATCTCATCA    |
| POT1-EX9        | TGCCAATATTCAGAGGCATAAG    | AAAAATTTACATGAGCAAAAATCAC |
| POT1-EX10       | ATTGGCCCCATATTGGTTAT      | GCACAAAAGGCTAGGGAAC       |
| POT1-EX18       | TCTAGATTATCTTTAATTGGACA   | ACTTCTAAAAGTCCACAGAGTACA  |
| IDH1            | CTCAGAGCCTTCGCTTTCTG      | CACATACAAGTTGGAAATTTCTGG  |
| IDH2            | GGGGTTCAAATTCTGGTTGA      | CTAGGCGAGGAGCTCCAGT       |
